# Supplementary material for: Non-Banks and Monetary Policy Transmission in India: An Exploration
Source: Research Square preprint supplement (doi:10.21203/rs.3.rs-8803586/v1), 2026-02-23
Supplement: Supplementary file 1 [file f2115fa3321236270384ebe6.docx]

**Supplementary Appendix**

**Analysis of Transmission in a Panel Fixed-effects (Static and Dynamic) Framework**

Using this framework, we find a strong and statistically significant pass-through from the weighted average call rate (WACR) to NBFCs’ WABR and WALR, while controlling for NBFC-specific balance-sheet characteristics and macroeconomic variables. This indicates the presence of the interest rate channel.

Appendix Table1: Fixed Effects (Static Model)

| Variable | Dependent variable | |
| --- | --- | --- |
| (1) | (2) |
| NBFC_WALR | NBFC_WABR |
| (WACR) | 0.191** | 0.279*** |
|  | (0.0740) | (0.0658) |
| Size | -0.0817 | -0.348*** |
|  | (0.186) | (0.119) |
| Liquidity ratio | 0.0175 | 0.00296 |
|  | (0.0142) | (0.00979) |
| Capital ratio | -0.00921 | 0.00777 |
|  | (0.0130) | (0.00618) |
| GNPA Ratio | -0.0104 | -0.00272 |
|  | (0.0157) | (0.0106) |
| GDP growth | -0.00725 | -0.0109** |
|  | (0.00554) | (0.00518) |
| Inflation | 0.147*** | 0.0977*** |
|  | (0.0395) | (0.0260) |
| Covid | -0.0505 | -0.762*** |
|  | (0.181) | (0.175) |
| NBFC Stress | -0.0589 | -0.0302 |
|  | (0.131) | (0.0963) |
| Observations | 2405 | 2214 |
| No. of NBFCs | 117 | 118 |

Note: Robust standard errors in parentheses.

* p<0.10, ** p<0.05, *** p<0.010

All NBFC and macro controls are taken with a one-quarter lag.

Taking the lagged dependent variable, we estimate the fixed-effects model under a dynamic framework. The statistically significant lagged dependent variable indicate strong persistence in NBFC borrowing and lending rates, implying that current outcomes are heavily influenced by their own past realisations. Our main variable of interest is the summed WACR coefficient, which is positive and statistically significant for both WALR (0.134) and WABR (0.157), indicating monetary policy pass-through.

Appendix Table 2: Fixed Effects (Dynamic Model)

| Variable | Dependent variable | |
| --- | --- | --- |
| (1) | (2) |
| NBFC_WALR | NBFC_WABR |
| Lagged NBFC_WALR | 0.439*** |  |
|  | (0.0600) |  |
| Lagged NBFC_WABR |  | 0.489*** |
|  |  | (0.0477) |
| (WACR) | 0.134** | 0.157*** |
|  | (0.0528) | (0.0431) |
| Size | -0.00414 | -0.202*** |
|  | (0.111) | (0.0712) |
| Liquidity ratio | 0.0144 | 0.00156 |
|  | (0.00975) | (0.00699) |
| Capital ratio | -0.00503 | 0.00495 |
|  | (0.00772) | (0.00383) |
| GNPA ratio | 0.00135 | -0.00606 |
|  | (0.0100) | (0.00642) |
| GDP growth | -0.00367 | -0.0123*** |
|  | (0.00442) | (0.00366) |
| Inflation | 0.0774** | 0.0646*** |
|  | (0.0321) | (0.0227) |
| Covid | 0.121 | -0.464*** |
|  | (0.171) | (0.164) |
| NBFC stress | -0.0723 | 0.00890 |
|  | (0.132) | (0.0729) |
| Observations | 2340 | 2105 |
| No. of NBFCs | 115 | 117 |

Note: Robust standard errors in parentheses

* p<0.10, ** p<0.05, *** p<0.010

All NBFC and macro controls are taken with a one-quarter lag.

**Transmission by NBFCs to Retail Loans**

We analyse transmission to retail credit using different fixed effects and clustering standard errors also at different levels to check for robustness following equation (4). We report results for personal loans, vehicle loans and business loans.

Dependent variable is new credit and our main variable of interest is ΔWACR. Our controls include NBFC-specific variables (size, capital ratio, GNPA ratio and liquidity ratio), macroeconomic variables (GDP growth and inflation), and borrower characteristics (age, gender and borrower quality). In column (1), we exclude all types of fixed effects. In column (2), we introduce NBFC fixed effects to control for unobserved time-invariant NBFC characteristics. In column (3), we introduce quarter fixed effects along with NBFC fixed effects, our specification in main results. In column (4), we control for NBFC-borrower and quarter fixed effects. In columns (5) and (6), we cluster standard errors at different levels.

The results are broadly consistent across all specifications in the case of personal loans with changes in coefficient values (Appendix table 3). In the case of vehicle loans, WACR turns insignificant in specifications (2), (5) and (6) while for business loans, the same is found in the case of columns (5) and (6) [ Appendix tables 4 and 5]. Given this is loan origination data, the errors are expected to be correlated at NBFC level (and not at borrower level) and to control for seasonality, specification (3) is found to be the most suitable and have been reported in the main manuscript.

Clustering at NBFC-borrower level is also redundant since this is loan origination data only and same loan does not repeat over time. Clustering solely at the quarter level assumes error correlations are confined only to time periods which is not the case here.

Clustering at the quarter-borrower level is also unsuitable since borrowers are unique and may not repeat across quarters. Quarter-borrower combinations will contain just a single observation, rendering the clustering ineffective as clusters need multiple observations to adjust for intra-cluster correlation.

Appendix Table 3: The NBFC Lending Channel to Retail Borrowers Personal Loans

|  | Dependent variable- log (New credit) | | | | | |
| --- | --- | --- | --- | --- | --- | --- |
|  | (1) | (2) | (3) | (4) | (5) | (6) |
| ΔWACR | -0.308*** | -0.224*** | -0.186** | -0.157*** | -0.224* | -0.224* |
|  | (0.090) | (0.076) | (0.088) | (0.025) | (0.078) | (0.078) |
| NBFC size | 0.369*** | -0.504 | -0.610 | -0.510 | -0.504 | -0.504 |
|  | (0.121) | (0.572) | (0.608) | (0.310) | (0.538) | (0.538) |
| NBFC capital ratio | -0.00865 | -0.00277 | -0.00164 | -0.00699 | -0.00277 | -0.00277 |
|  | (0.015) | (0.008) | (0.008) | (0.009) | (0.010) | (0.010) |
| NBFC asset quality | -0.0996*** | 0.00370 | 0.00862 | 0.0171 | 0.00370 | 0.00370 |
|  | (0.027) | (0.017) | (0.020) | (0.010) | (0.016) | (0.016) |
| NBFC liquidity ratio | 0.00682 | -0.00725* | -0.00822** | -0.00269 | -0.00725 | -0.00725 |
|  | (0.010) | (0.004) | (0.003) | (0.004) | (0.003) | (0.003) |
| Inflation | -0.129 | -0.0643 | -0.0522 | -0.0263 | -0.0643 | -0.0643 |
|  | (0.106) | (0.090) | (0.093) | (0.030) | (0.084) | (0.084) |
| GDP growth | 0.0289*** | 0.00877 | 0.0125*** | 0.0101*** | 0.00877 | 0.00877 |
|  | (0.006) | (0.006) | (0.004) | (0.004) | (0.006) | (0.006) |
| Male borrowers | 0.0916*** | 0.0706*** | 0.0704*** | -0.0115 | 0.0706** | 0.0706** |
|  | (0.013) | (0.011) | (0.011) | (0.013) | (0.015) | (0.015) |
| Prime borrowers | 0.409*** | 0.372*** | 0.369*** | 0.226*** | 0.372*** | 0.372*** |
|  | (0.048) | (0.018) | (0.017) | (0.009) | (0.028) | (0.028) |
| Borrower age | 0.0257*** | 0.0194*** | 0.0191*** | 0.00216* | 0.0194*** | 0.0194*** |
|  | (0.005) | (0.002) | (0.002) | (0.001) | (0.002) | (0.002) |
| Covid | 1.018*** | 1.146*** | 1.193*** | 0.378* | 1.146** | 1.146** |
|  | (0.358) | (0.264) | (0.239) | (0.214) | (0.257) | (0.257) |
| NBFC stress | 0.513 | -0.435 | -0.503 | 0.0237 | -0.435 | -0.435 |
|  | (0.534) | (0.530) | (0.543) | (0.075) | (0.461) | (0.461) |
| R2 | 0.225 | 0.365 | 0.367 | 0.571 | 0.365 | 0.365 |
| Observations | 9211506 | 9211504 | 9211504 | 6962450 | 9211504 | 9211504 |
| No of NBFCs | 42 | 40 | 40 | 33 | 40 | 40 |
| NBFC FE | No | Yes | Yes | No | Yes | Yes |
| NBFC-Borrower FE | No | No | No | Yes | No | No |
| Quarter FE | No | No | Yes | Yes | No | No |

Standard errors are in parentheses.

Errors are clustered at NBFC level in columns (1) (2) (3) and (4), at NBFC and quarter level in column (5) and at NBFC, quarter and borrower level in column (6). All NBFC and macro controls are taken with a one-quarter lag.

* *p* < 0.10, ** *p* < 0.05, *** *p* < 0.01

Appendix Table 4: The NBFC Lending Channel to Retail Borrowers Vehicle Loans

|  | Dependent variable- log (new retail credit) | | | | | |
| --- | --- | --- | --- | --- | --- | --- |
|  | (1) | (2) | (3) | (4) | (5) | (6) |
| ΔWACR | 0.0909** | 0.0335 | 0.0327* | 0.0473*** | 0.0335 | 0.0335 |
|  | (0.043) | (0.022) | (0.019) | (0.015) | (0.023) | (0.023) |
| NBFC size | 0.115 | 0.197 | 0.197 | 0.0341 | 0.197 | 0.197 |
|  | (0.143) | (0.211) | (0.199) | (0.155) | (0.178) | (0.178) |
| NBFC capital ratio | 0.0117 | 0.0113 | 0.0113 | 0.00334 | 0.0113 | 0.0113 |
|  | (0.016) | (0.010) | (0.010) | (0.008) | (0.009) | (0.009) |
| NBFC asset quality | 0.0872*** | -0.000612 | -0.00368 | -0.0123 | -0.0006 | -0.000612 |
|  | (0.031) | (0.009) | (0.008) | (0.008) | (0.010) | (0.010) |
| NBFC liquidity ratio | 0.0147 | -0.0115 | -0.0115 | -0.0180** | -0.0115 | -0.0115 |
|  | (0.017) | (0.012) | (0.012) | (0.008) | (0.010) | (0.010) |
| Inflation | 0.0691 | 0.0157** | 0.0108 | 0.00155 | 0.0157 | 0.0157 |
|  | (0.051) | (0.008) | (0.009) | (0.013) | (0.007) | (0.007) |
| GDP growth | -0.00850 | 0.00417 | 0.00505 | -0.000553 | 0.0042 | 0.00417 |
|  | (0.007) | (0.004) | (0.004) | (0.002) | (0.008) | (0.008) |
| Male borrowers | 0.251*** | 0.0147 | 0.0151 | -0.0243 | 0.0147 | 0.0147 |
|  | (0.060) | (0.025) | (0.025) | (0.021) | (0.027) | (0.027) |
| Prime borrowers | 0.202*** | 0.0372** | 0.0361** | 0.00210 | 0.0372 | 0.0372 |
|  | (0.069) | (0.018) | (0.018) | (0.016) | (0.025) | (0.025) |
| Borrower age | 0.0258*** | 0.00471*** | 0.0047*** | -0.00111 | 0.0047* | 0.00471* |
|  | (0.008) | (0.002) | (0.002) | (0.001) | (0.002) | (0.002) |
| Covid | -0.716** | -0.588 | -0.532 | -0.725** | -0.588 | -0.588 |
|  | (0.330) | (0.434) | (0.405) | (0.335) | (0.306) | (0.306) |
| NBFC stress | -0.0244 | -0.0266 | -0.0597** | 0.0208 | -0.0266 | -0.0266 |
|  | (0.107) | (0.021) | (0.023) | (0.026) | (0.053) | (0.053) |
| R2 | 0.213 | 0.601 | 0.602 | 0.832 | 0.601 | 0.601 |
| Observations | 724230 | 724228 | 724228 | 153289 | 724228 | 724228 |
| No of NBFCs | 38 | 36 | 36 | 32 | 36 | 36 |
| NBFC FE | No | Yes | Yes | No | Yes | Yes |
| NBFC-Borrower FE | No | No | No | Yes | No | No |
| Quarter FE | No | No | Yes | Yes | No | No |

Standard errors are in parentheses

Errors are clustered at NBFC level in columns (1) (2) (3) and (4), at NBFC and quarter level in column (5) and at NBFC, quarter and borrower level in column (6). All NBFC and macro controls are taken with a one-quarter lag.

* *p* < 0.10, ** *p* < 0.05, *** *p* < 0.01

Appendix Table 5: The NBFC Lending Channel to Retail Borrowers Business Loans

|  | Dependent variable- log (New credit) | | | | | |
| --- | --- | --- | --- | --- | --- | --- |
|  | (1) | (2) | (3) | (4) | (5) | (6) |
| ΔWACR | -0.00394 | -0.0383*** | -0.0538*** | -0.0328*** | -0.0383 | -0.0383 |
|  | (0.065) | (0.013) | (0.014) | (0.011) | (.) | (.) |
| NBFC size | 0.00476 | 0.147 | 0.213* | 0.235 | 0.147 | 0.147 |
|  | (0.174) | (0.099) | (0.108) | (0.148) | (.) | (.) |
| NBFC capital ratio | 0.0449** | 0.0226** | 0.0248** | 0.0133*** | 0.0226 | 0.0226 |
|  | (0.018) | (0.011) | (0.012) | (0.002) | (.) | (.) |
| NBFC asset quality | 0.0625 | 0.0112 | 0.0195 | 0.00182 | 0.0112 | 0.0112 |
|  | (0.050) | (0.015) | (0.014) | (0.004) | (.) | (.) |
| NBFC liquidity ratio | -0.00217 | -0.000166 | -0.00188 | -0.0117** | -0.000166 | -0.000166 |
|  | (0.025) | (0.004) | (0.004) | (0.005) | (.) | (.) |
| Inflation | 0.112 | 0.0168 | 0.0247 | -0.0110 | 0.0168 | 0.0168 |
|  | (0.077) | (0.026) | (0.028) | (0.008) | (.) | (.) |
| GDP growth | 0.00939 | 0.00445 | 0.00139 | -0.00738*** | 0.00445 | 0.00445 |
|  | (0.012) | (0.004) | (0.004) | (0.002) | (.) | (.) |
| Male borrowers | 0.217** | 0.0840*** | 0.0840*** | -0.294*** | 0.0840 | 0.0840 |
|  | (0.104) | (0.003) | (0.003) | (0.069) | (.) | (.) |
| Prime borrowers | 0.107 | 0.0322*** | 0.0312*** | 0.0195*** | 0.0322 | 0.0322 |
|  | (0.074) | (0.010) | (0.010) | (0.005) | (.) | (.) |
| Borrower age | 0.00733 | 0.000569 | 0.000582 | 0.0186*** | 0.000569 | 0.000569 |
|  | (0.008) | (0.003) | (0.003) | (0.003) | (.) | (.) |
| Covid | 1.372*** | -0.0908 | -0.165 | -0.315*** | -0.0908 | -0.0908 |
|  | (0.427) | (0.129) | (0.115) | (0.085) | (.) | (.) |
| NBFC Stress | 0.100 | 0.0752 | 0.163 | 0.0203 | 0.0752 | 0.0752 |
|  | (0.169) | (0.073) | (0.107) | (0.017) | (.) | (.) |
| R2 | 0.205 | 0.593 | 0.594 | 0.919 | 0.593 | 0.593 |
| Observations | 103432 | 103428 | 103428 | 62437 | 103428 | 103428 |
| No of NBFCs | 55 | 51 | 51 | 32 | 51 | 51 |
| NBFC FE | No | Yes | Yes | No | Yes | Yes |
| NBFC-Borrower FE | No | No | No | Yes | No | No |
| Quarter FE | No | No | Yes | Yes | No | No |

Standard errors are in parentheses.

Errors are clustered at NBFC level in columns (1) (2) (3) and (4), at NBFC and quarter level in column (5) and at NBFC, quarter and borrower level in column (6). All NBFC and macro controls are taken with a one-quarter lag.

* *p* < 0.10, ** *p* < 0.05, *** *p* < 0.01
